# Supplementary material for: Ovonic threshold switching-based artificial afferent neurons for thermal in-sensor computing
Source: Royal Society of Chemistry journal article supplement (doi:10.1039/d4mh00053f), 2024-01-01
Supplement: d4mh00053f1.pdf [file d4mh00053f1.pdf]

## Supporting Information

### **Ovonic threshold switching-based artificial afferent neurons for thermal in-sensor computing**

Kai Li<sup>a</sup>, Jiaping Yao<sup>a</sup>, Peng Zhao<sup>a</sup>, Yunhao Luo<sup>a</sup>, Xiang Ge<sup>a</sup>, Rui Yang<sup>a,b</sup>, Xiaomin Cheng<sup>a,b\*</sup>,  
and Xiangshui Miao<sup>a,b\*</sup>

<sup>a</sup> School of Integrated Circuits, Hubei Key Laboratory for Advanced Memories, Wuhan National Laboratory for Optoelectronics, Huazhong University of Science and Technology, Wuhan 430074, China.

<sup>b</sup> Hubei Yangtze Memory Laboratories, Wuhan 430205, China.

\*Corresponding Author. E-mail address: [xmcheng@hust.edu.cn](mailto:xmcheng@hust.edu.cn); [miaoxs@hust.edu.cn](mailto:miaoxs@hust.edu.cn)

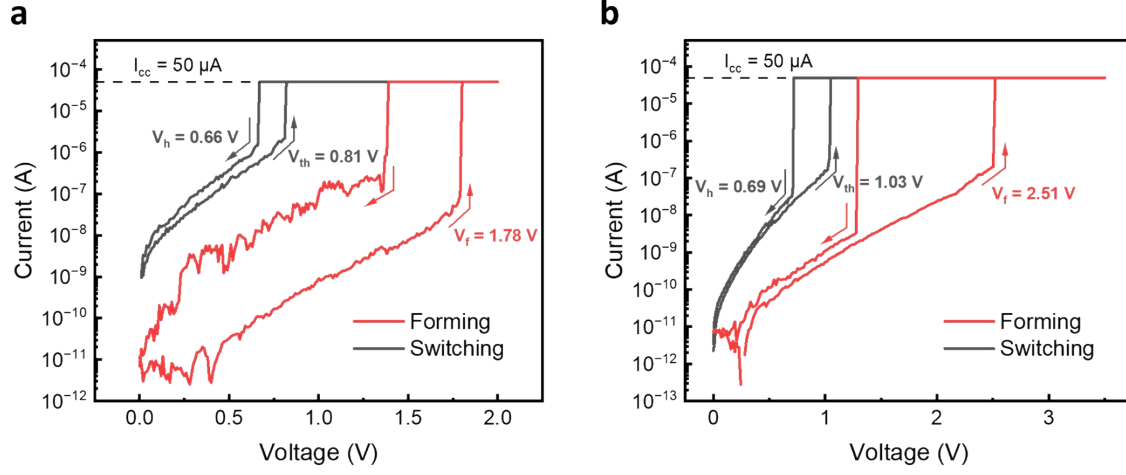

**Fig. S1** The DC  $I$ - $V$  sweep of forming and switching for (a) SiTe and (b) N-doped SiTe devices.

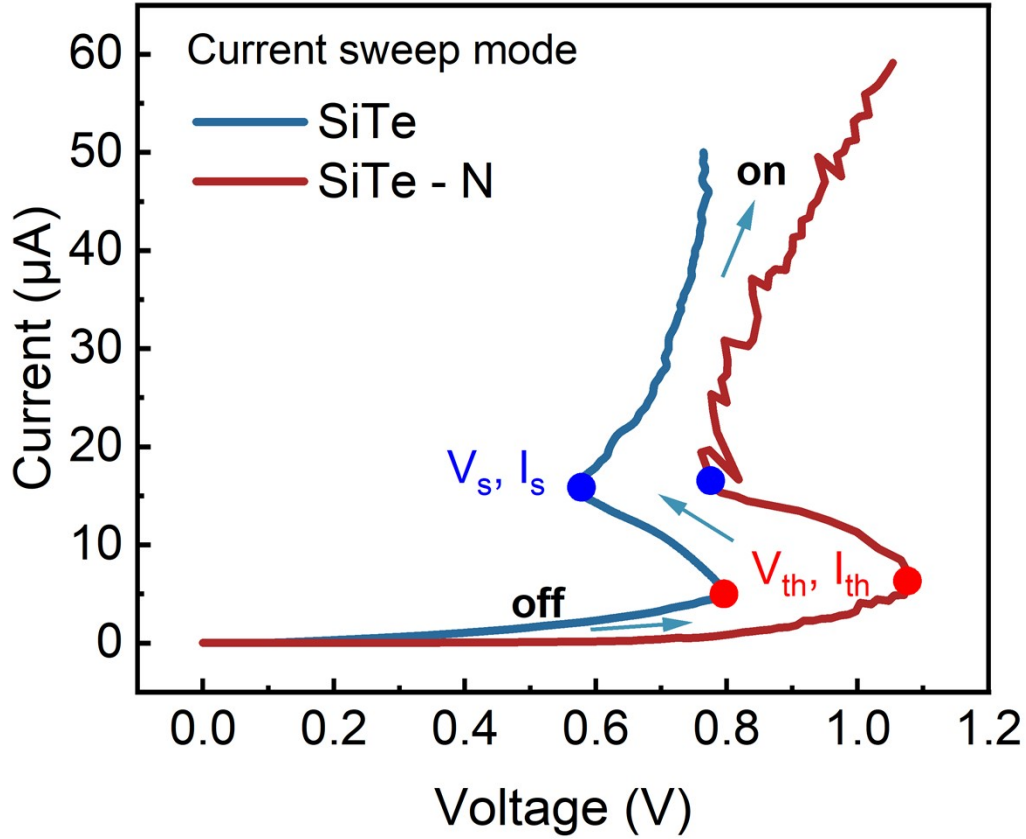

**Fig. S2** The current-controlled  $I$ - $V$  characteristics of SiTe and N-doped SiTe devices. Red and blue closed circles denote the threshold points and “snap-back” points, respectively. S-shaped negative differential resistance (NDR) is observed in both devices. In the voltage sweep mode, a compliance current (CC) is always set to protect the devices and maintain the volatile properties. Unlike voltage sweep, the current sweep mode can readily visualize the voltage and current status of the OTS devices immediately after threshold switching. It can be found that N-doped SiTe device exhibits lower leakage current and larger threshold voltage than SiTe device. When  $I_{th}$  is reached, the devices resistance decrease abruptly and exhibit characteristic NDR. The devices then are turned on at the “snap-back” points, the starting point of the ON state.

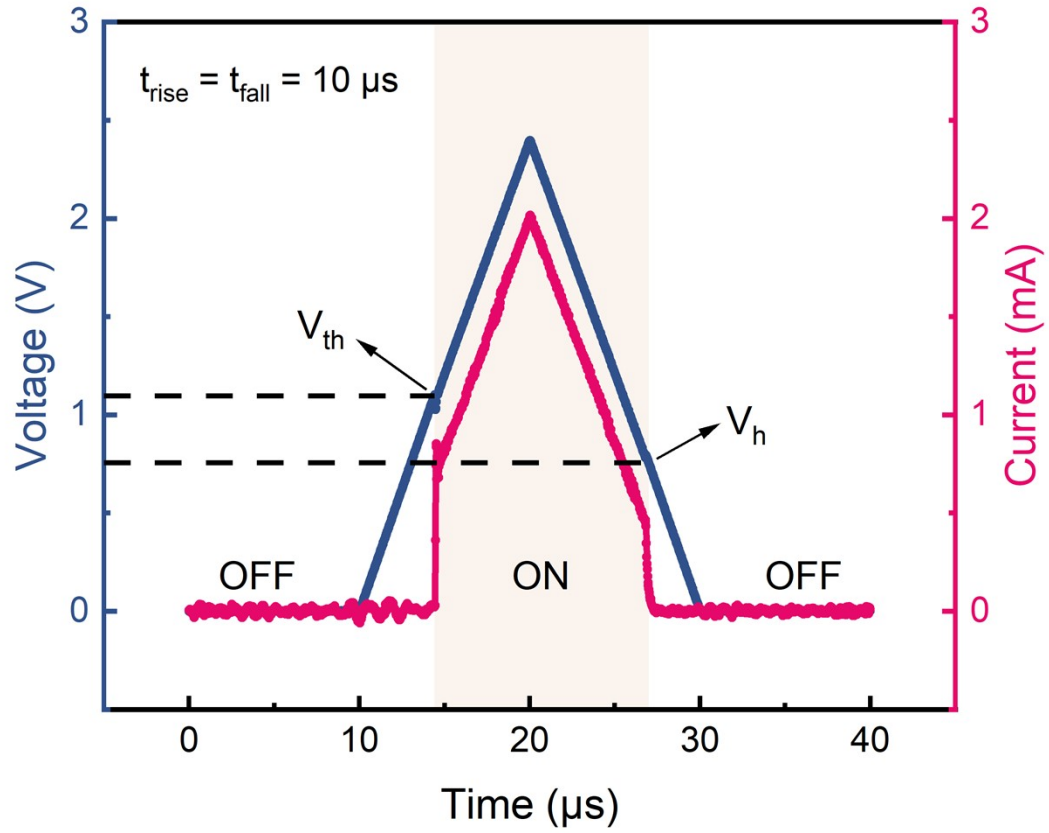

**Fig. S3** Dynamical transient response of the N-doped SiTe OTS device under the triangular voltage pulse with a 2.5 V amplitude and 10  $\mu\text{s}$  rising/falling edges.  $V_{th}$  and  $V_h$  are extracted from the switch between the ON state and OFF state. The blue line represents the voltage signal applied on the device, and the pink line represents the acquired current signal.

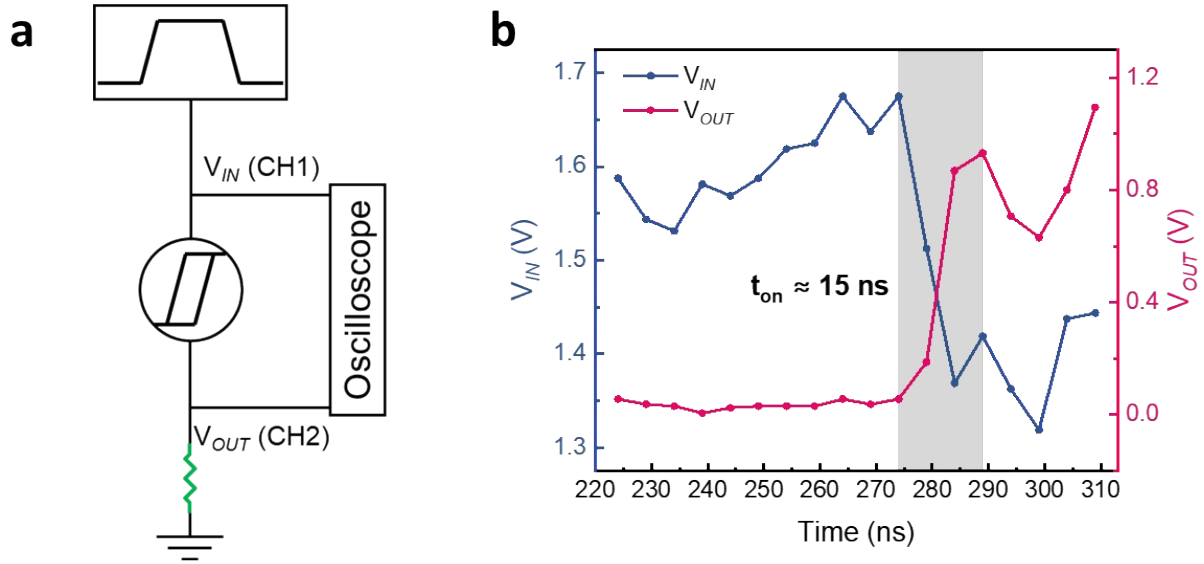

**Fig. S4** (a) The schematic switching speed test circuit of the OTS device. (b) Enlarged view of ON switching curves, the N-doped SiTe OTS device is turned on within  $\sim 15$  ns at a voltage of 1.68 V.

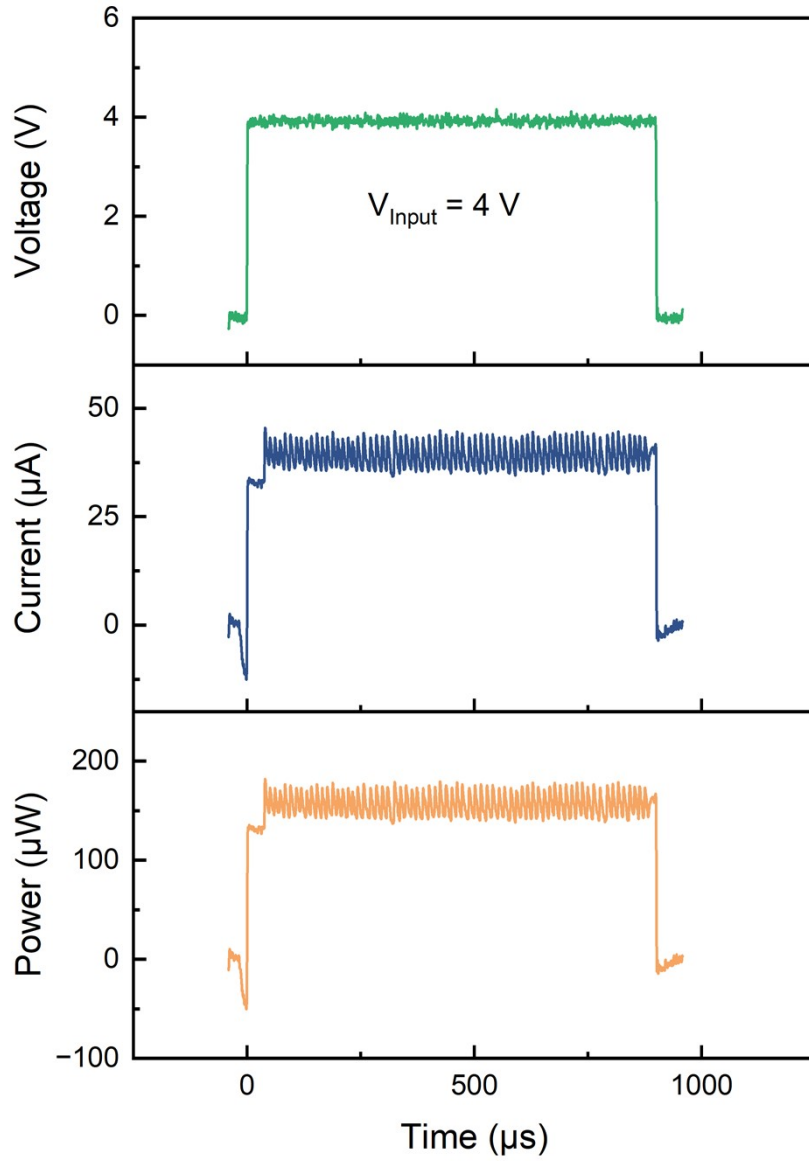

**Fig. S5** The energy consumption of artificial thermal afferent neurons based on N-doped SiTe OTS at 25 °C. The transient power is calculated by multiplying the input voltage by the output current, and the energy consumption for each spike is determined by dividing the total energy consumption by the number of spikes within a period of time.

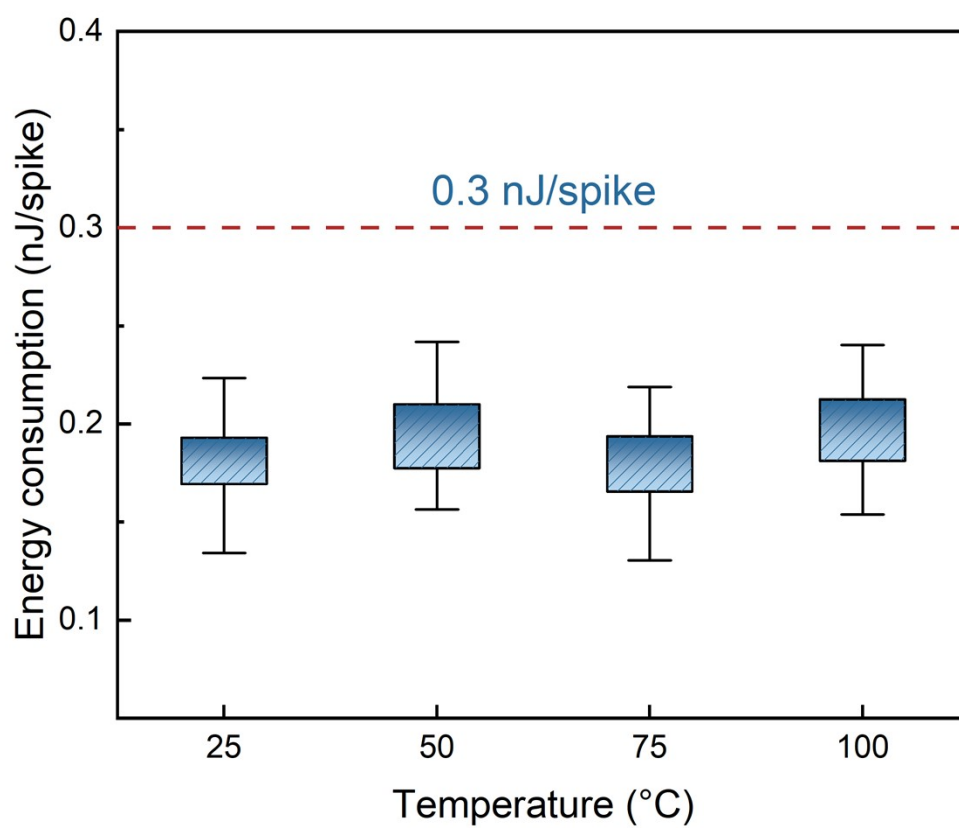

**Fig. S6** The corresponding calculated energy consumption *versus* temperature. Five sets of energy consumption were measured for each temperature.

**Table S1.** Comparison of artificial afferent neurons based on different materials.

| Devices                    | Materials      | Leakage current ( $\mu\text{A}$ ) | Threshold Voltage (V) | Energy consumption (nJ/spike) | Additional sensor | Reference |
|----------------------------|----------------|-----------------------------------|-----------------------|-------------------------------|-------------------|-----------|
| Metal-insulator transition | $\text{VO}_2$  | 300                               | 1.35                  | 2.9                           | Required          | [1]       |
|                            | $\text{NbO}_x$ | $\sim 100$                        | -1.42                 | $\sim 6$                      | Required          | [2]       |
|                            | $\text{NbO}_x$ | 10-100                            | -1.65                 | N.A.                          | Required          | [3]       |
| Ovonic threshold switching | N-doped SiTe   | $5.5 \times 10^{-3}$              | 1.03                  | $< 0.3$                       | Not required      | This work |



## References

- 1 R. Yuan, Q. Duan, P. J. Tiw, G. Li, Z. Xiao, Z. Jing, K. Yang, C. Liu, C. Ge, R. Huang and Y. Yang, *Nat Commun*, 2022, **13**, 3973.
- 2 F. Li, R. Wang, C. Song, M. Zhao, H. Ren, S. Wang, K. Liang, D. Li, X. Ma, B. Zhu, H. Wang and Y. Hao, *ACS Nano*, 2021, **15**, 16422–16431.
- 3 Q. Wu, B. Dang, C. Lu, G. Xu, G. Yang, J. Wang, X. Chuai, N. Lu, D. Geng, H. Wang and L. Li, *Nano Lett.*, 2020, **20**, 8015–8023.
